# Supplementary material for: Polyaniline and sodium alginate nanocomposite: a pH-responsive adsorbent for the removal of organic dyes from water
Source: PubMed Central journal article supplement — RSC Adv. 2020 Dec 16;10(71):43904–14. doi: 10.1039/d0ra08125f (PMC9058493; doi:10.1039/d0ra08125f), 2020-12-16
Supplement: RA-010-D0RA08125F-s001.pdf [file RA-010-D0RA08125F-s001.pdf]

## Supplementary Information

### **Polyaniline and Sodium Alginate Nanocomposite: A pH- Responsive Adsorbent for Removal of Organic Dyes from Water**

Deola Majhi<sup>1</sup> and Braja N. Patra<sup>2\*</sup>

<sup>1</sup>School of Chemistry, Sambalpur University, Sambalpur, Odisha, India -768019

<sup>2</sup>Department of Chemistry, Utkal University, Bhubaneswar, Odisha, India -751004

Telephone No: 91-8895019001

E –mail: brajapatra@gmail.com

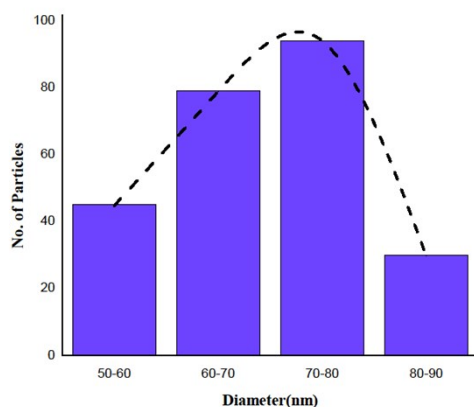

**Fig. S1:** Particle size distribution of PANI/SA nanocomposite as determined by TEM

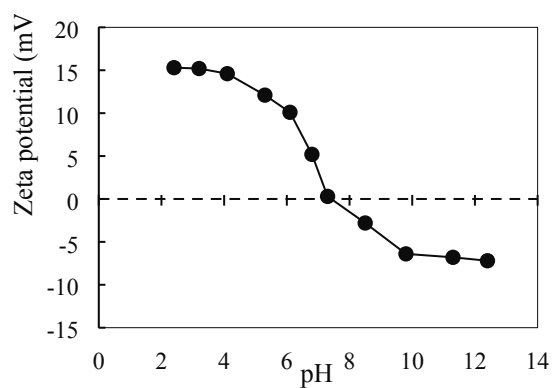

**Fig. S2:** Zeta potential of PANI/SA nanocomposites

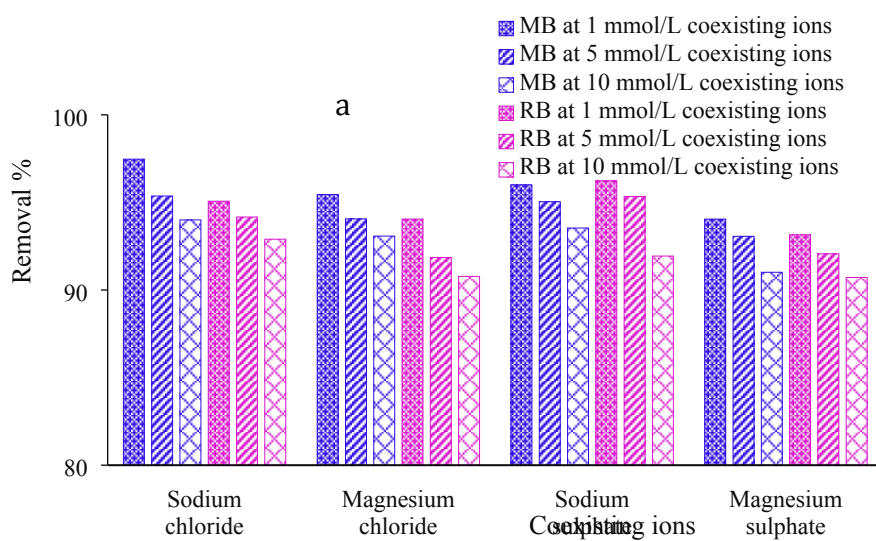

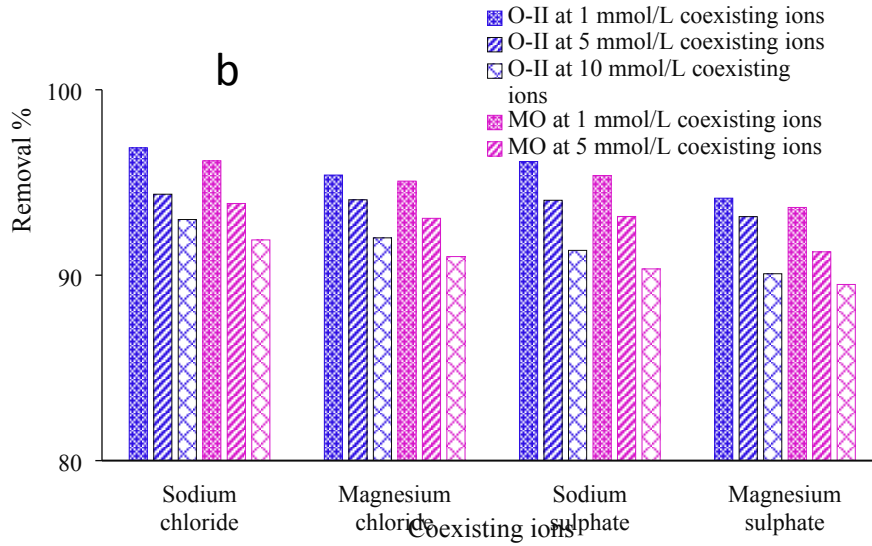

**Fig.S3:** Concentration profile of MB/RB at pH 9 (a) and O-II/MO at pH 3 (b) in presence of different ionic strength

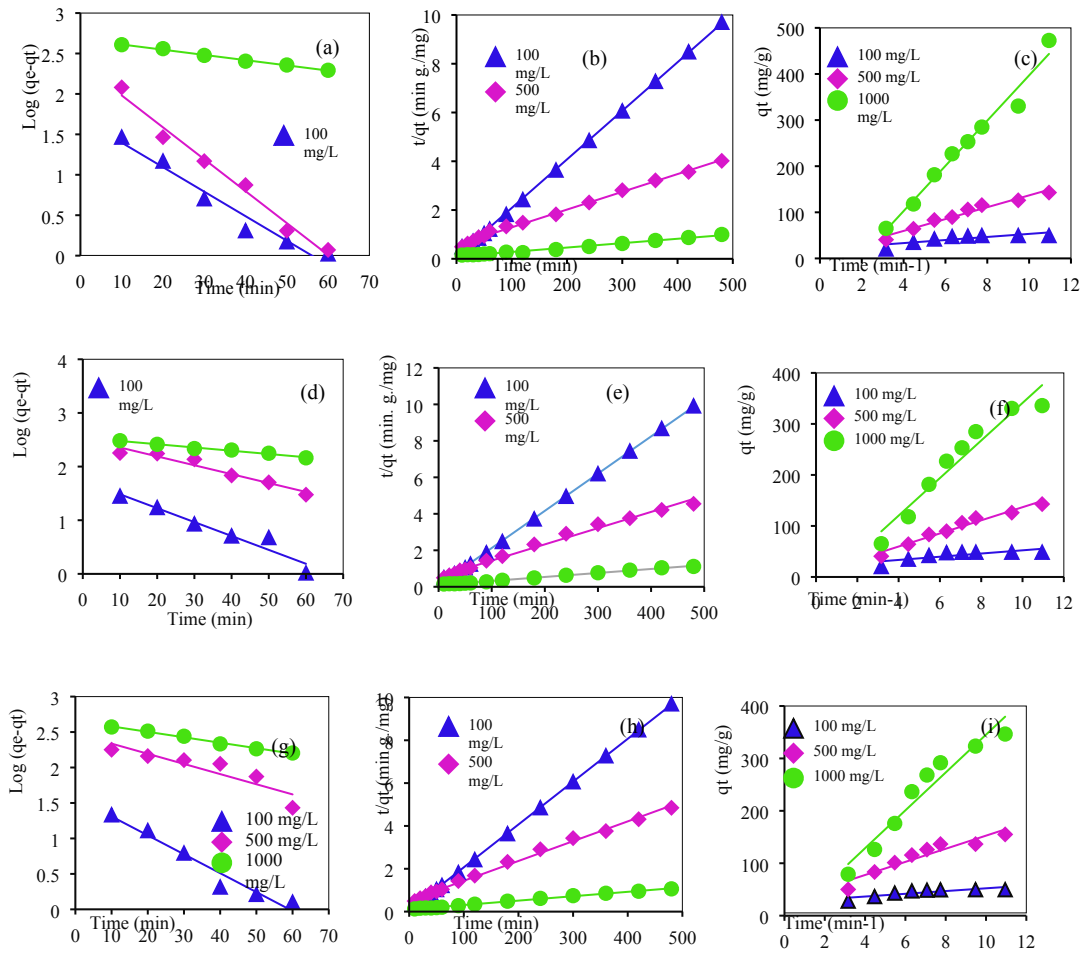

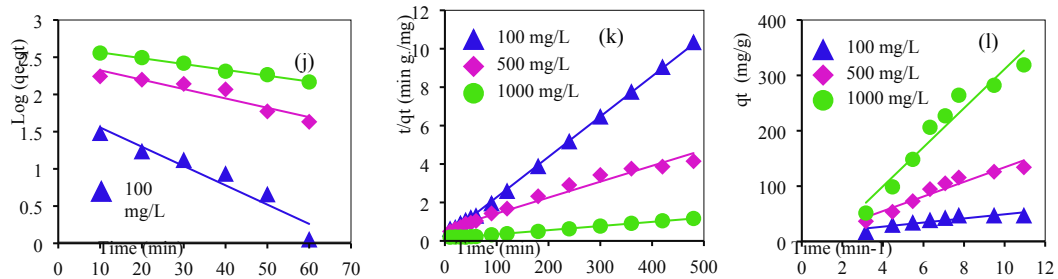

**Fig. S4:** Modelling of the adsorption kinetics of RB, MB, O-II and MO using (a), (d), (g), (j) as pseudo-first-order; (b), (e), (h), (k) as pseudo-second-order; (c), (f), (i), (l) as intra-particle diffusion onto PANI/SA nanocomposite.

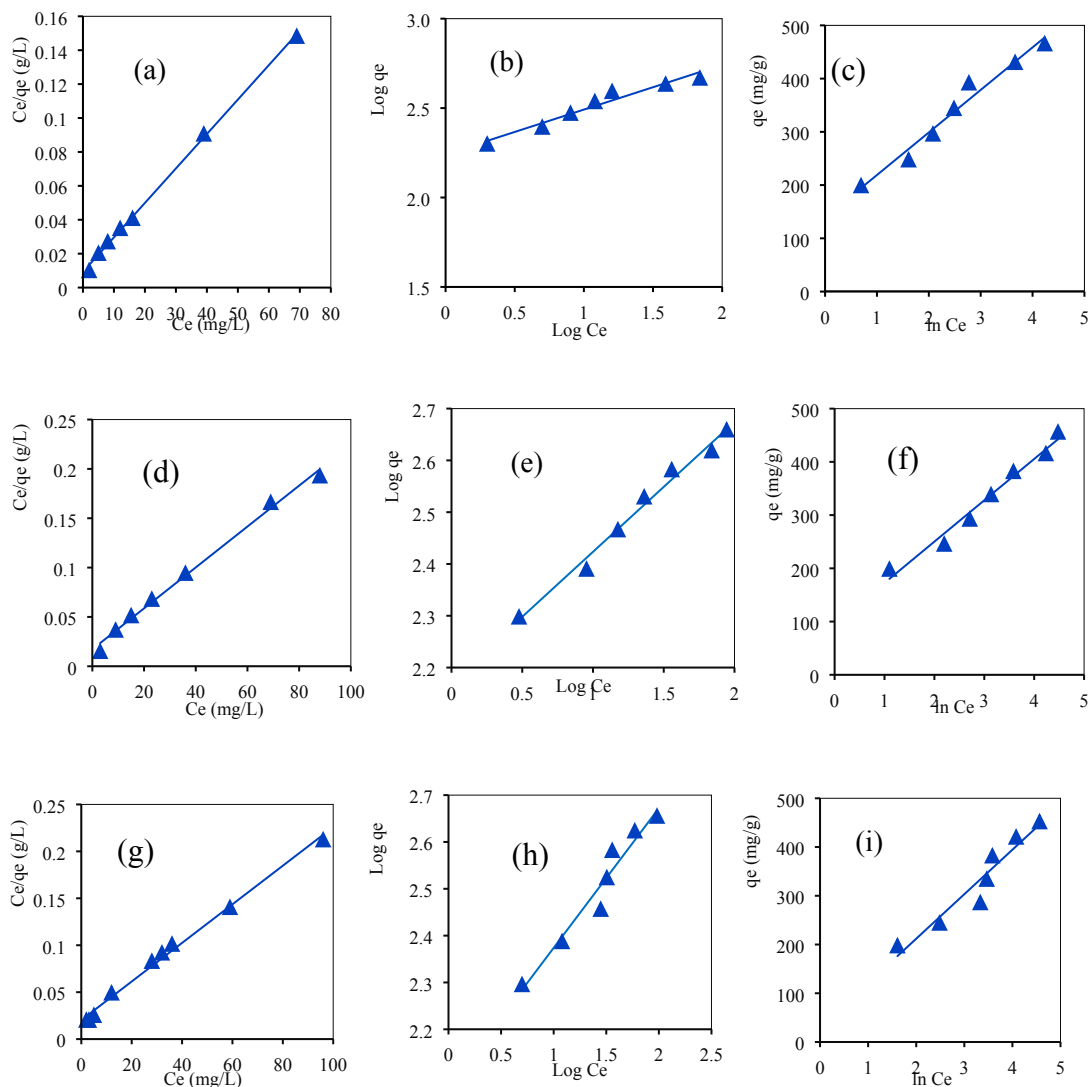

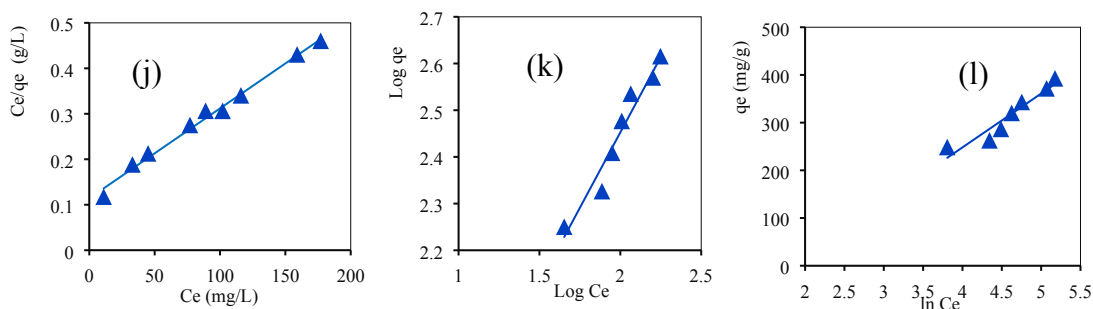

**Fig. S5:** Modelling of the adsorption isotherm of RB, MB, O-II and MO using (a), (d), (g), (j) as Langmuir isotherm; (b), (e), (h), (k) as Freundlich isotherm; (c), (f), (i), (l) as Temkin isotherm onto PANI/SA nanocomposite

Table-S1: Comparison of dye removal (MB, RB, O-II, MO) properties with other reported pH responsive adsorbents:

| Adsorbents            | Dyes | Q max(mg/g) | ref       |
|-----------------------|------|-------------|-----------|
| GO/PNA                | RB   | 193.05      | 1         |
| BSA_Au NCs            | MB   | 345         | 2         |
| DMC/AA                | MB   | 386.4       | 3         |
| PANI/SA               | MB   | 555         | This work |
|                       | RB   | 435         |           |
|                       | O-II | 476         |           |
|                       | MO   | 417         |           |
| Exf.LT/AP-g-p(DEAEMA) | MB   | 599         | 4         |
|                       | MO   | 558         |           |

#### References:

1. G.Yao, S. Li, J. Xu and H. Liu, *J. Chem. Eng. Data* 2019, **64**, 4054-4065.
2. A. Upadhyay and C. P. Rao, *ACS Appl. Mater. Interfaces* 2019, **11**, 7965-7973
3. R. Wei, W. Song, F. Yang, J. Zhou, M. Zhang, X. Zhang, W. Zhao and C. Zhao, *Ind. Eng. Chem. Res.* 2018, **57**, 8209-8219.
4. A. K. Sarkar, A. Saha, A. B. Panda and S. Pal, *Chem. Commun.*, 2015, **51**, 16057-16060.
